# Supplementary material for: Comprehensive clinical profiling of the Gauting locoregional lung adenocarcinoma donors
Source: PubMed Central journal article supplement (PMC6488114; doi:10.1002/cam4.2031), 2019-02-25
Supplement: CAM4-8-1486-s001.pdf [file CAM4-8-1486-s001.pdf]

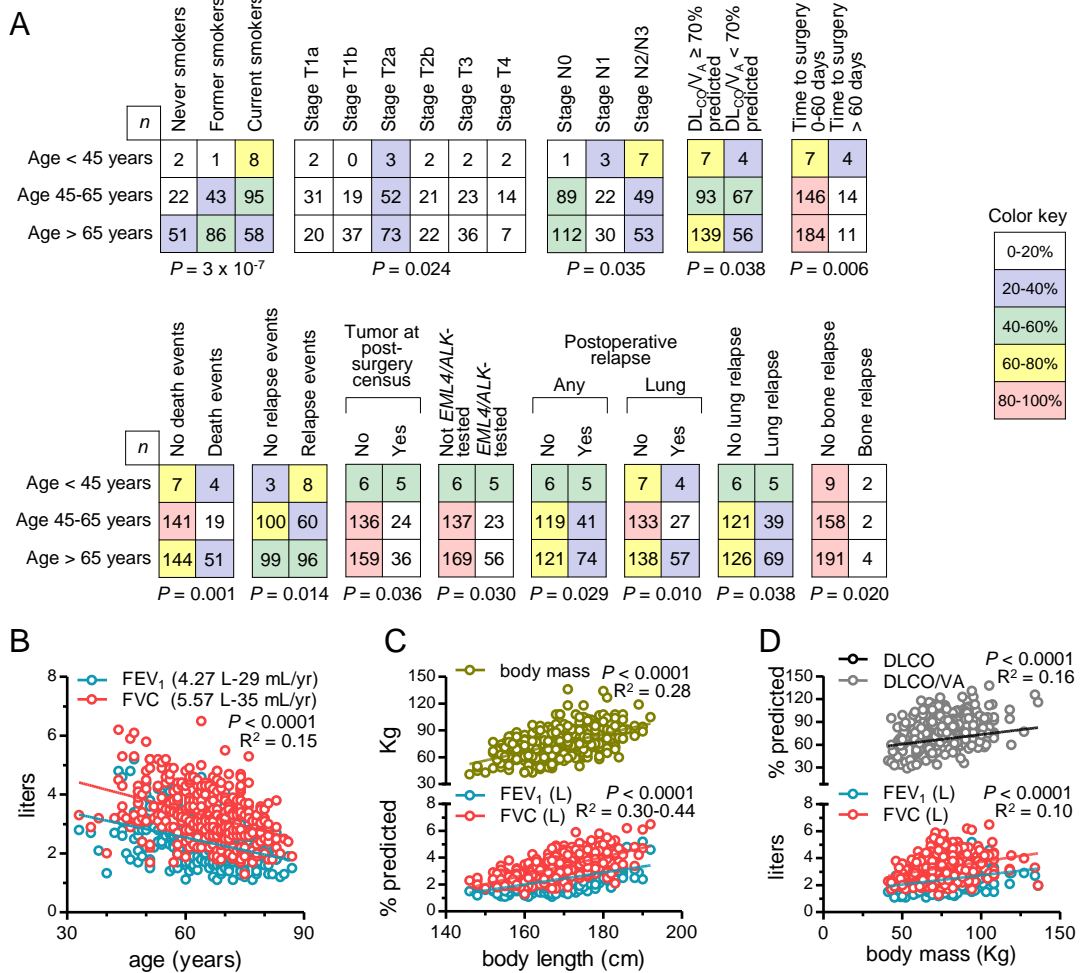

**Figure S1. Impact of age on GLAD.**

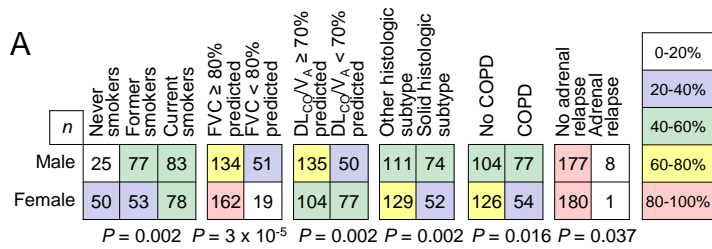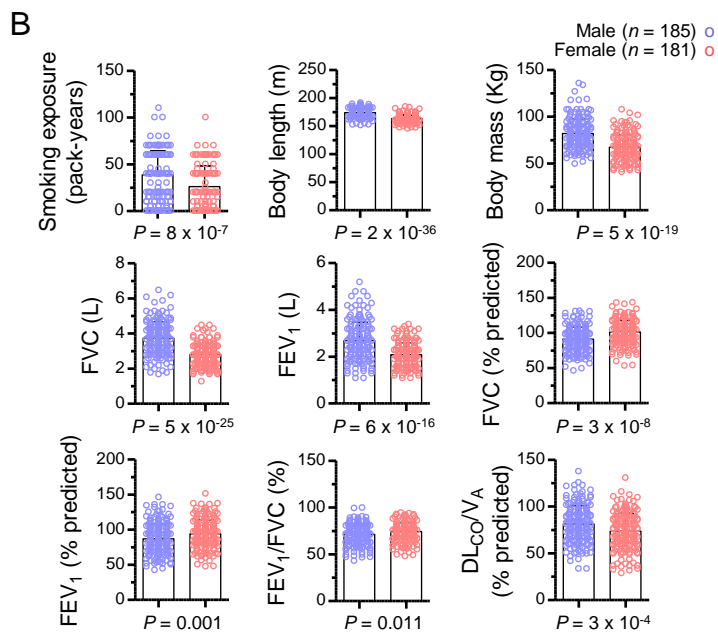

**Figure S2. Associations with sex in the GLAD cohort.**

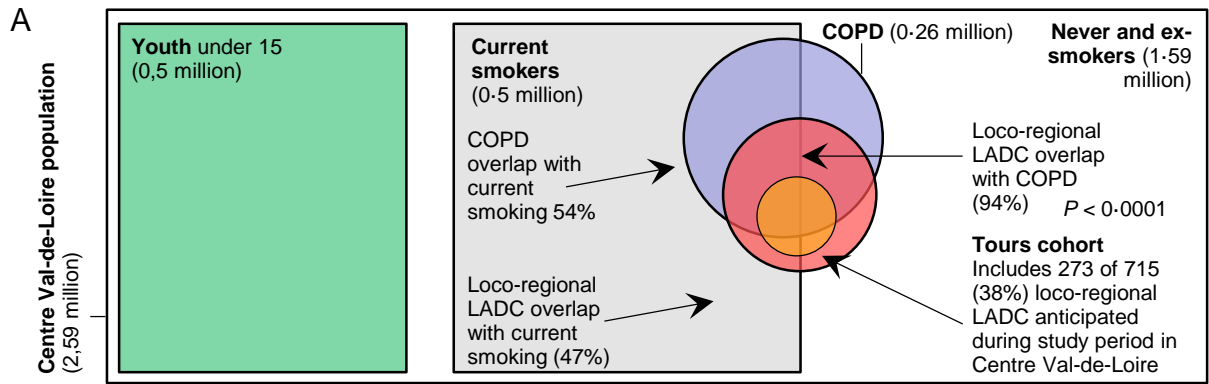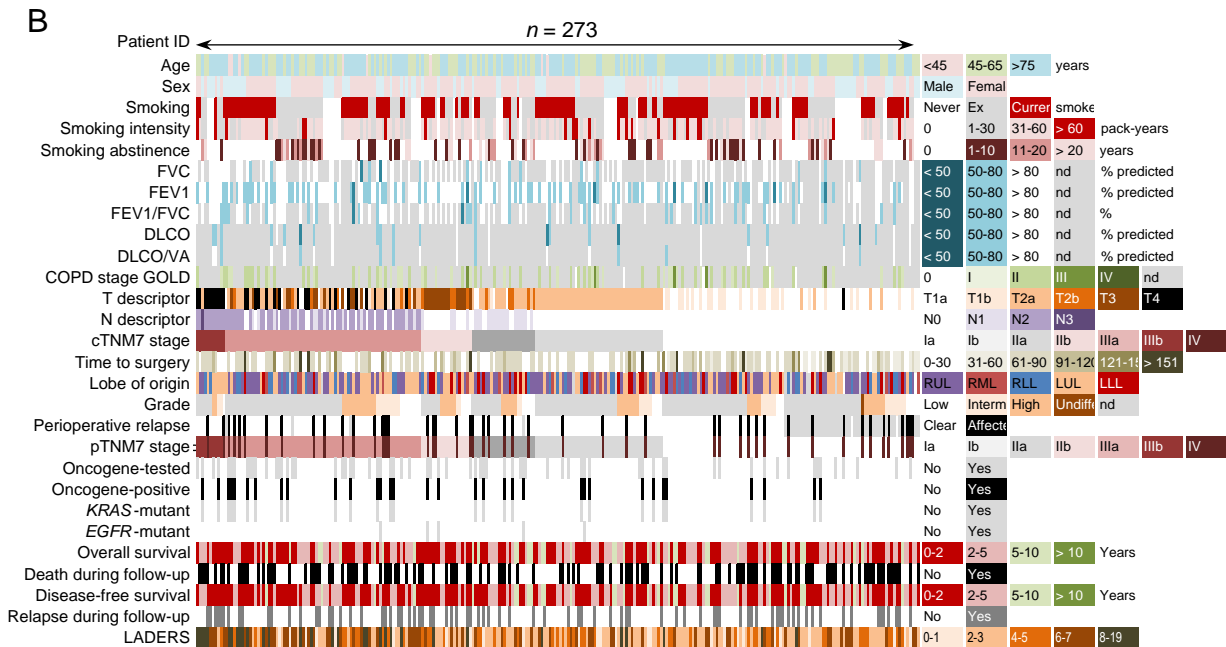

Figure S3. The Tours locoregional lung adenocarcinoma donors cohort.

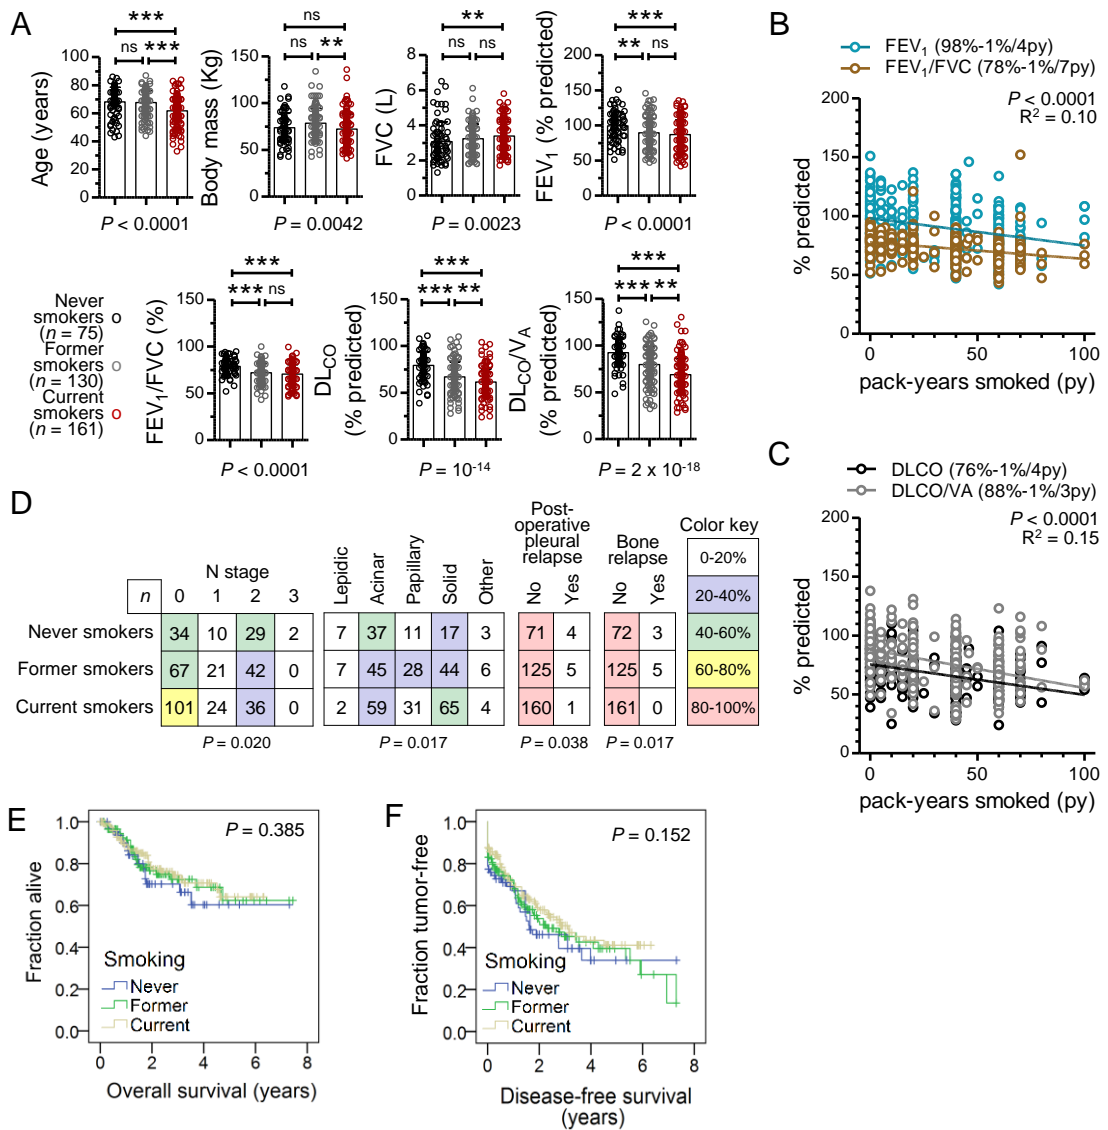

**Figure S4. Smoking status, exposure, and effects in the GLAD cohort.**

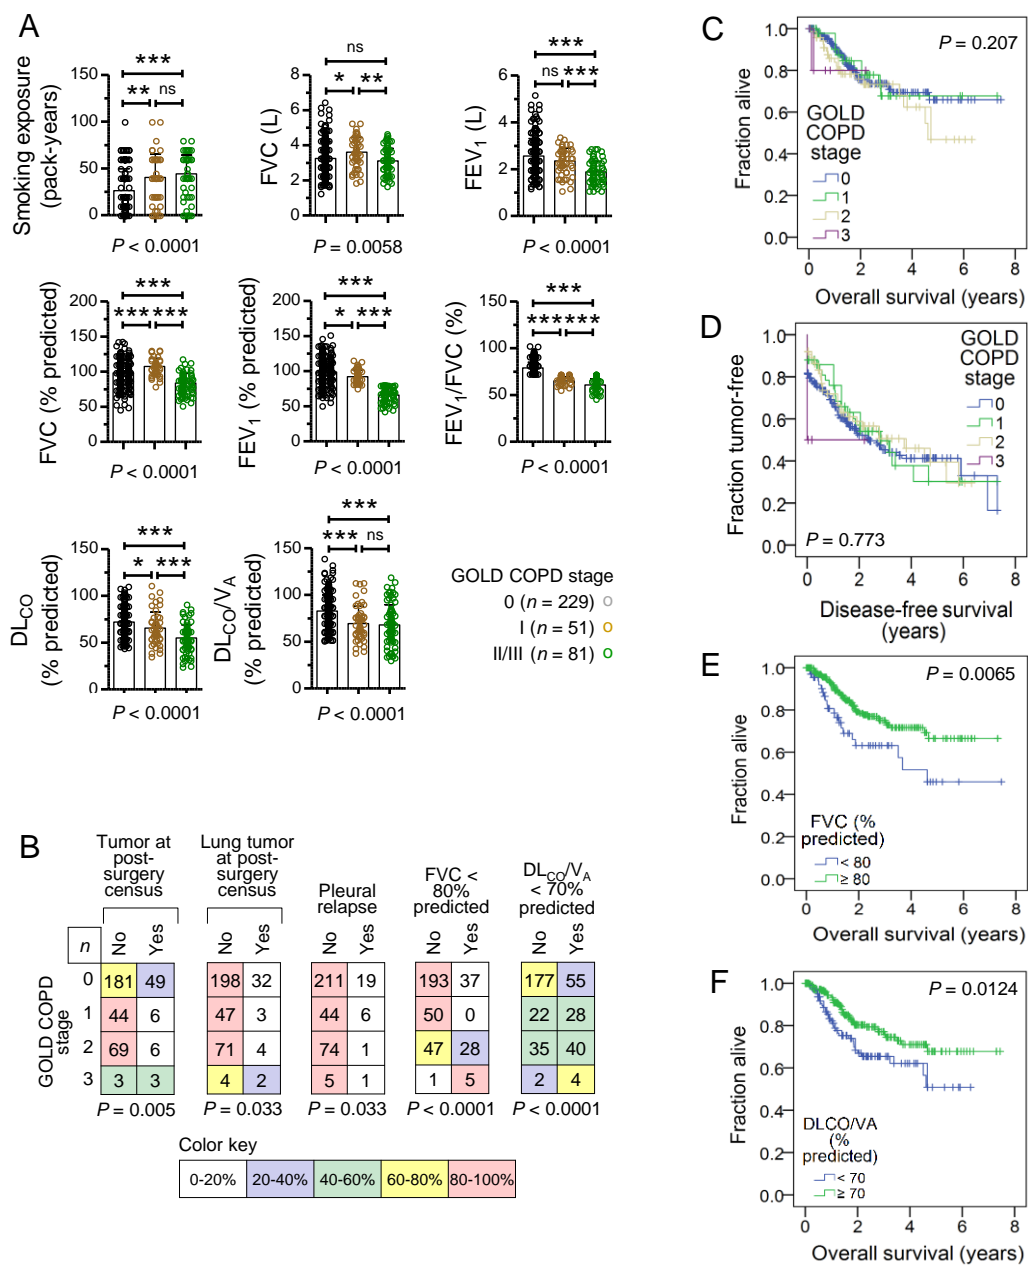

**Figure S5. Chronic obstructive pulmonary disease (COPD) in the GLAD cohort.**

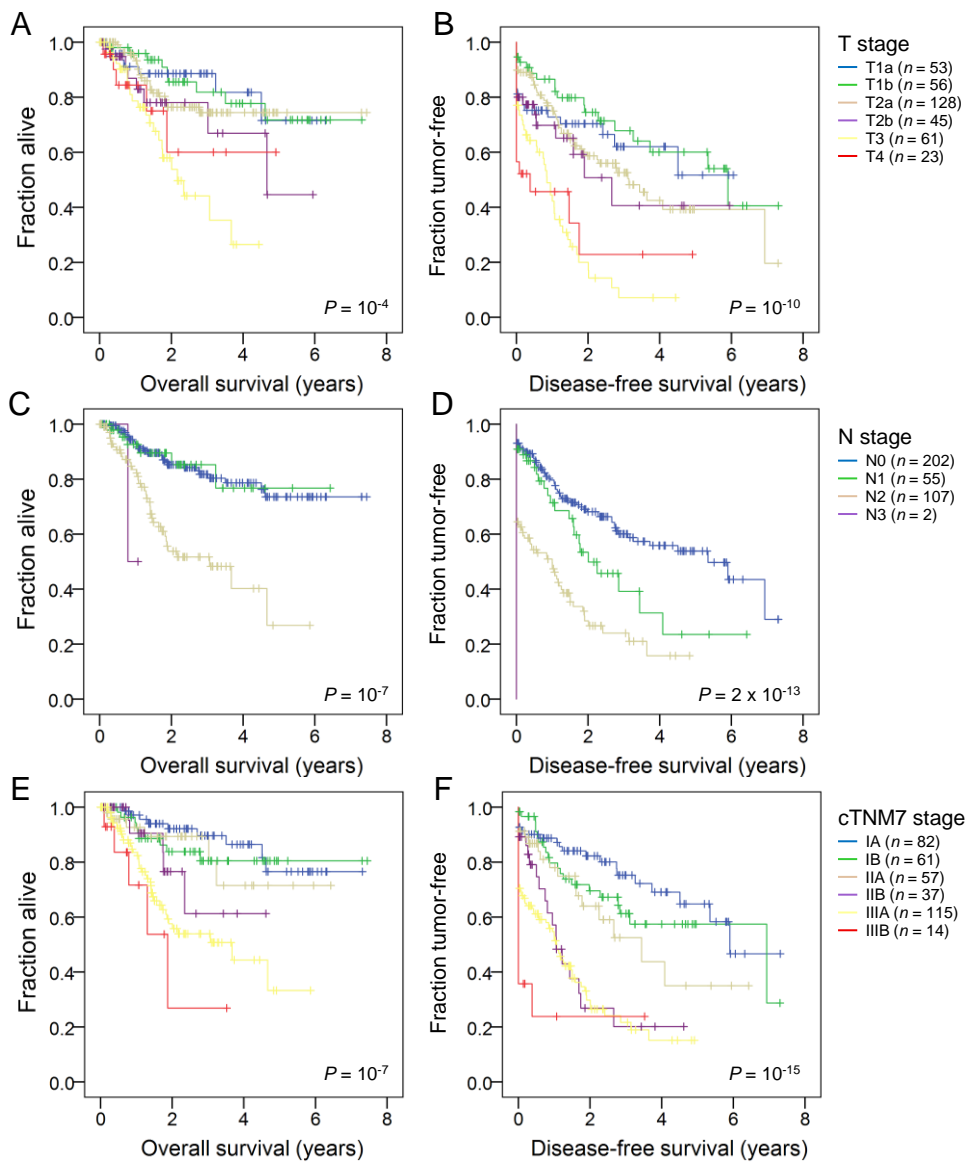

**Figure S6. Validation of GLAD cTNM7 staging.**

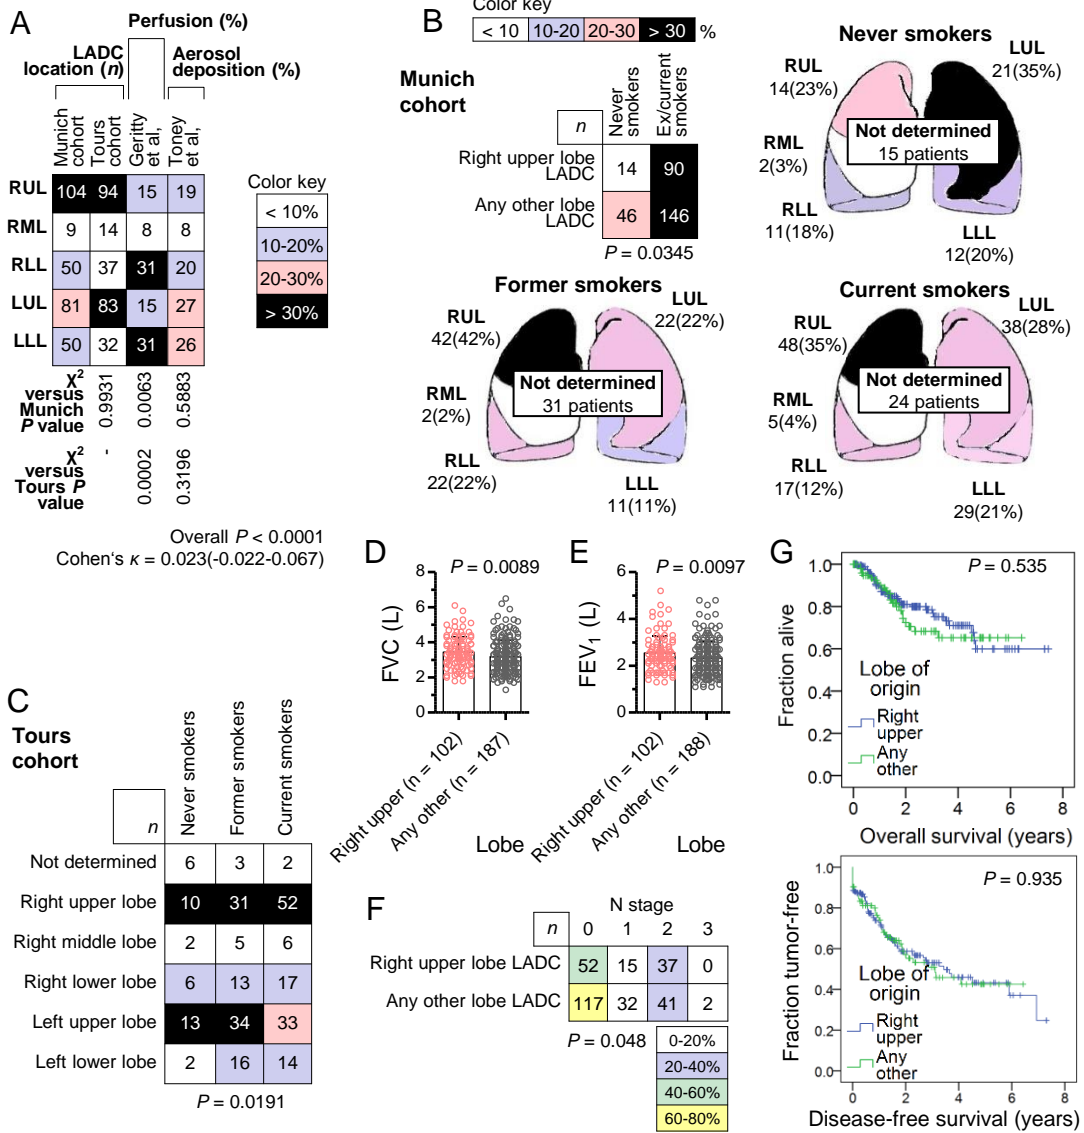

**Figure S7. Tumor location on the GLAD and Tours cohorts.**

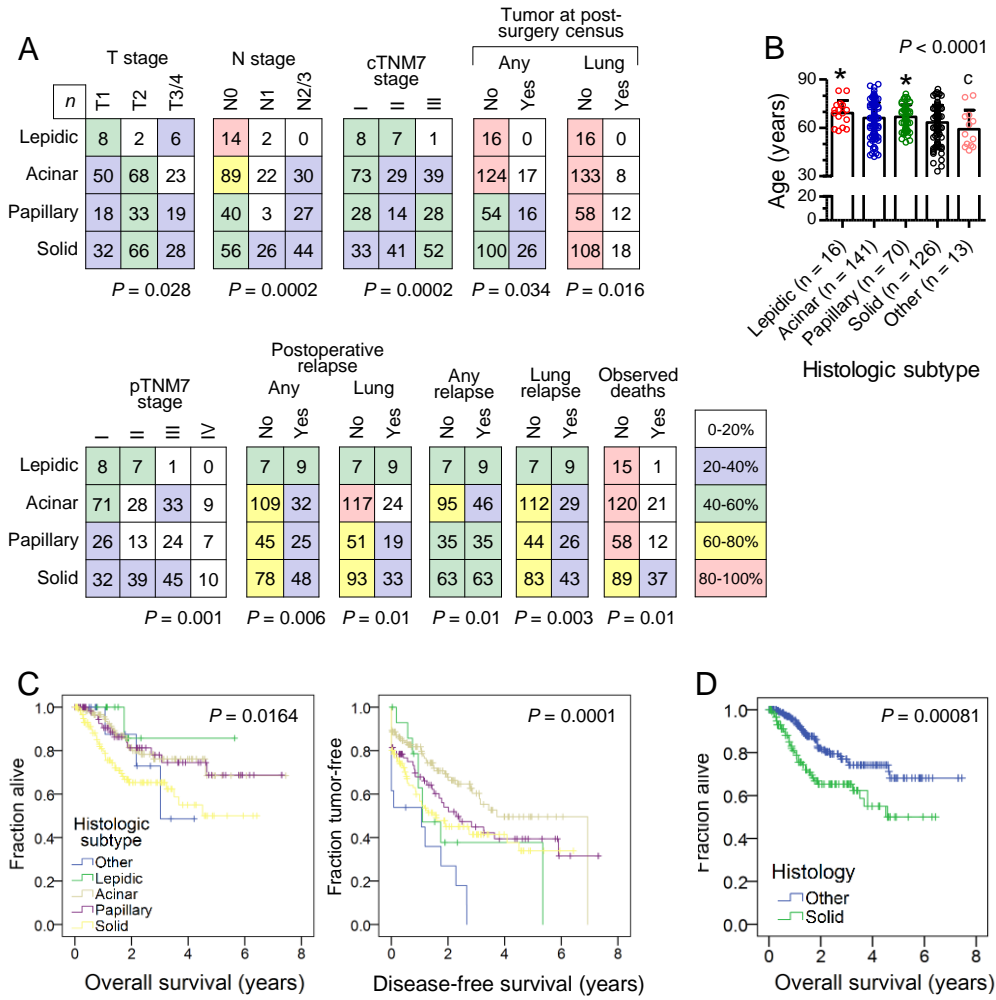

**Figure S8. Impact of histologic subtype on outcomes in the GLAD cohort.**



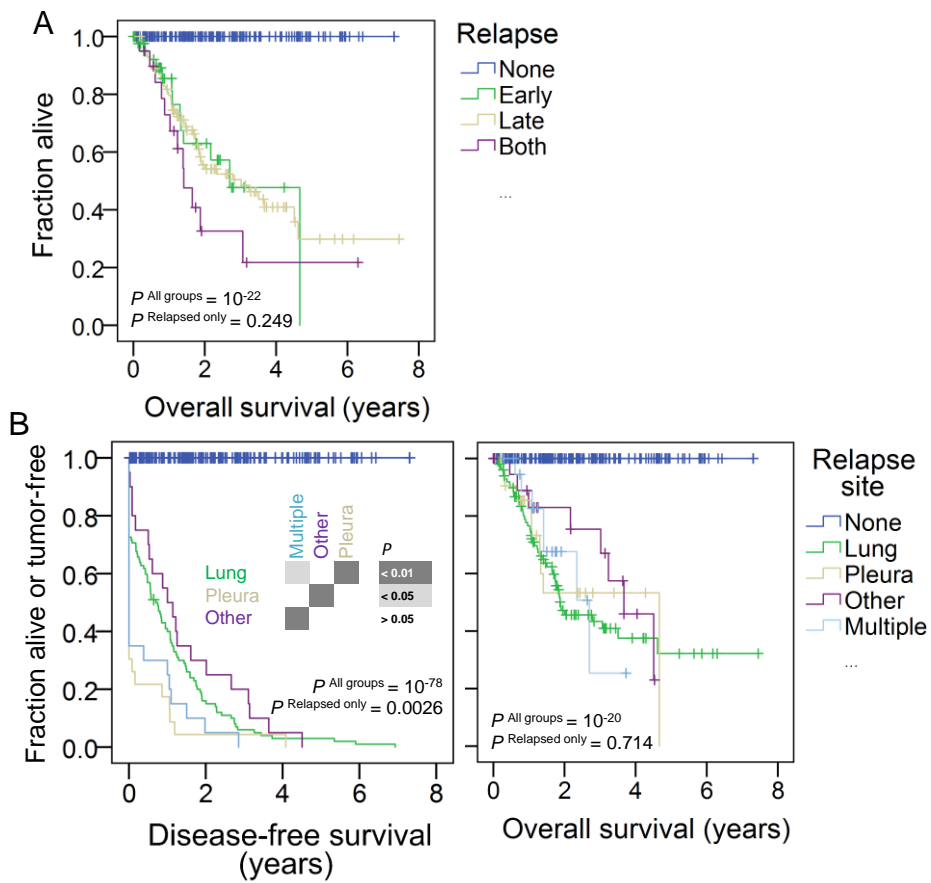

**Figure S9. Patterns of relapse of GLAD..**

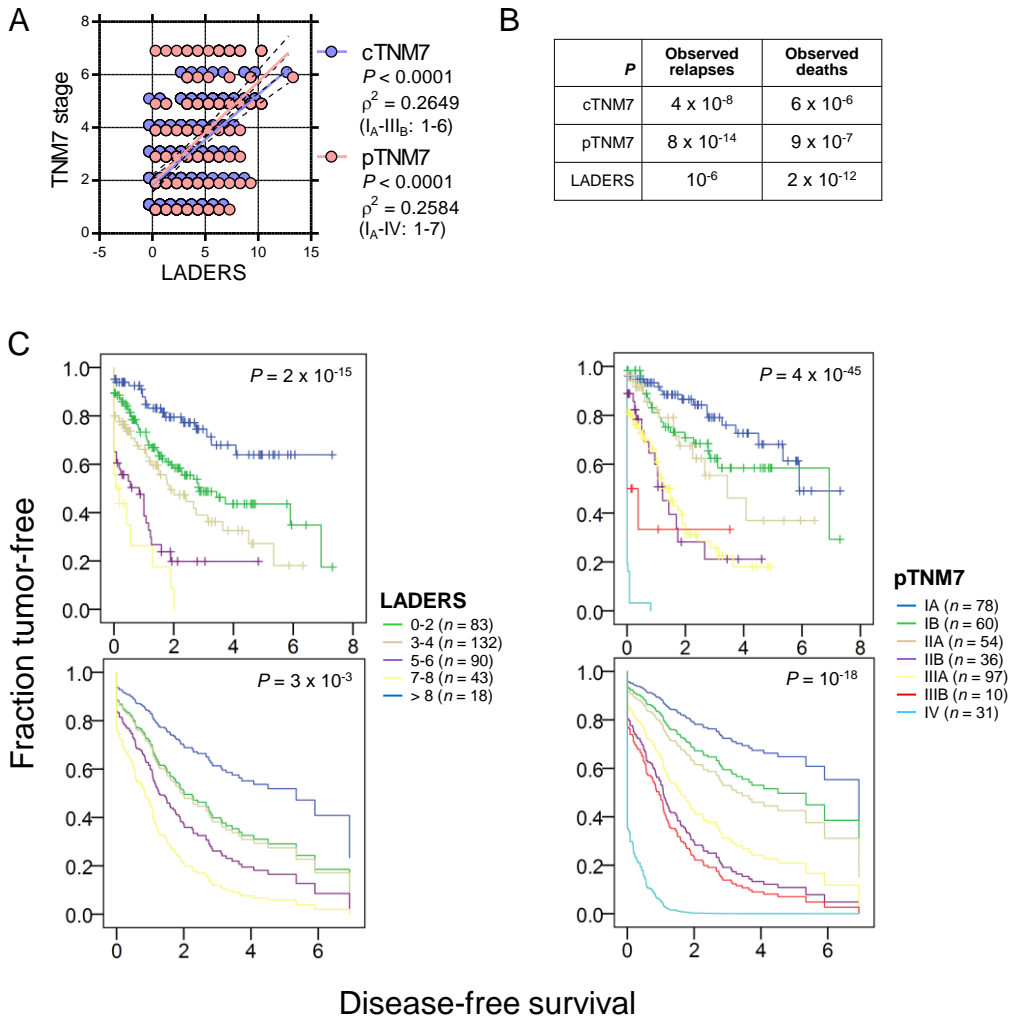

**Figure S10. Comparison of the lung adenocarcinoma death risk score (LADERS) to TNM systems and their impact on disease-free survival.**
